# Supplementary material for: Characterization of Wall Paintings of the Harem Court in the Alhambra Monumental Ensemble: Advantages and Limitations of In Situ Analysis
Source: MDPI journal article supplement (doi:10.3390/molecules27051490), 2022-02-23

## Supplementary Material

**Figure S1.** Location of the measurement points (2-41) and samples (R and B) in the Harem Court.

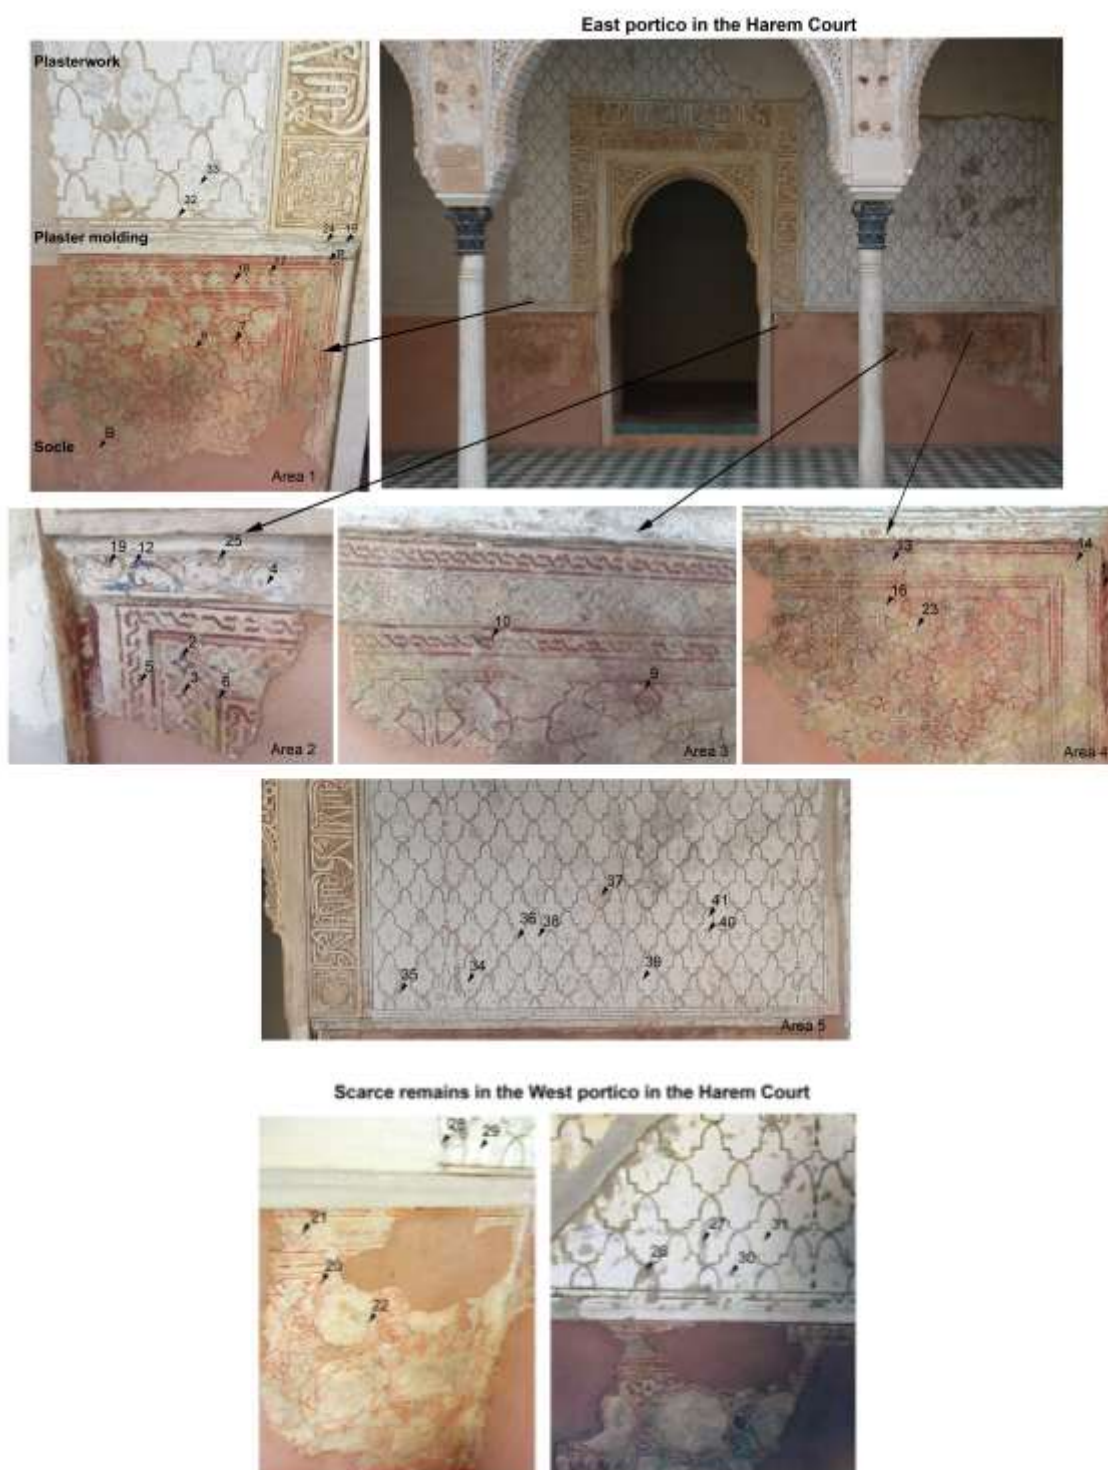

**Table S1.** Description of the measurement points.

| Point | Observed color/material | Location              | Typology        |
|-------|-------------------------|-----------------------|-----------------|
| 1     | System calibration      | -                     | -               |
| 2     | blue                    | East portico - Area 2 | Socle           |
| 3     | blue                    | East portico - Area 2 | Socle           |
| 4     | white                   | East portico - Area 2 | Plaster molding |
| 5     | red                     | East portico - Area 2 | Socle           |
| 6     | red                     | East portico - Area 2 | Socle           |
| 7     | red                     | East portico - Area 1 | Socle           |
| 8     | red                     | East portico - Area 1 | Socle           |
| 9     | red                     | East portico - Area 3 | Socle           |
| 10    | red                     | East portico - Area 3 | Socle           |
| 11    | red                     | East portico - Area 4 | Socle           |
| 12    | blue                    | East portico - Area 2 | Plaster molding |
| 13    | blue                    | East portico - Area 4 | Socle           |
| 14    | blue                    | East portico - Area 4 | Plaster molding |
| 15    | blue                    | East portico - Area 1 | Plaster molding |
| 16    | blue                    | East portico - Area 4 | Socle           |
| 17    | black                   | East portico - Area 1 | Socle           |
| 18    | black                   | East portico - Area 1 | Socle           |
| 19    | red                     | East portico - Area 2 | Plaster molding |
| 20    | red                     | West portico - Area 6 | Socle           |
| 21    | blue                    | West portico - Area 6 | Socle           |
| 22    | blue                    | West portico - Area 6 | Socle           |
| 23    | black                   | East portico - Area 4 | Socle           |
| 24    | black                   | East portico - Area 1 | Plaster molding |
| 25    | black                   | East portico - Area 2 | Plaster molding |
| 26    | gypsum                  | West portico - Area 7 | Plasterwork     |
| 27    | gypsum                  | West portico - Area 7 | Plasterwork     |
| 28    | gypsum                  | West portico - Area 6 | Plasterwork     |
| 29    | white                   | West portico - Area 6 | Plasterwork     |
| 30    | gypsum                  | West portico - Area 7 | Plasterwork     |
| 31    | white                   | West portico - Area 7 | Plasterwork     |
| 32    | gypsum                  | East portico - Area 1 | Plaster molding |
| 33    | white                   | East portico - Area 1 | Plaster molding |
| 35    | gypsum                  | East portico - Area 5 | Plasterwork     |
| 36    | gypsum                  | East portico - Area 5 | Plasterwork     |
| 37    | gypsum                  | East portico - Area 5 | Plasterwork     |
| 40    | gypsum                  | East portico - Area 5 | Plasterwork     |
| 34    | white                   | East portico - Area 5 | Plasterwork     |
| 38    | white                   | East portico - Area 5 | Plasterwork     |
| 39    | white                   | East portico - Area 5 | Plasterwork     |
| 41    | white                   | East portico - Area 5 | Plasterwork     |

Note: A XRF spectrum was registered for each point. Several Raman spectra were also registered for each point, although not all of them contained useful information.

**Figure S2.** Zoom in the XRF spectra (obtained using the low filter) to show the smallest contributions: a) in a black motif (measurement point 24) and b) in a blue motif (measurement point 16).

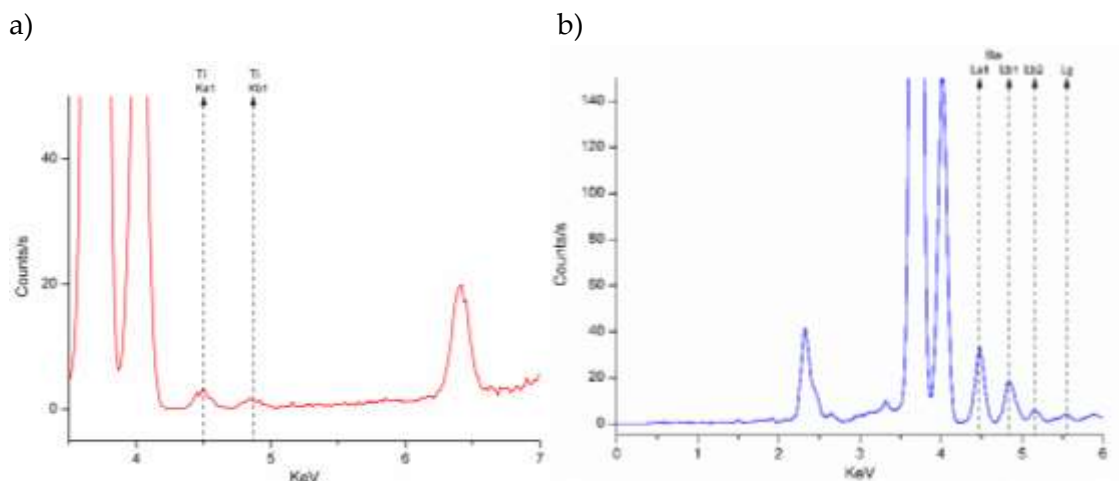

Supplement: s1 [file s1]
